# Supplementary material
Source: publisher figshare collection journal article supplement (https://tandf.figshare.com/ndownloader/files/22286418)

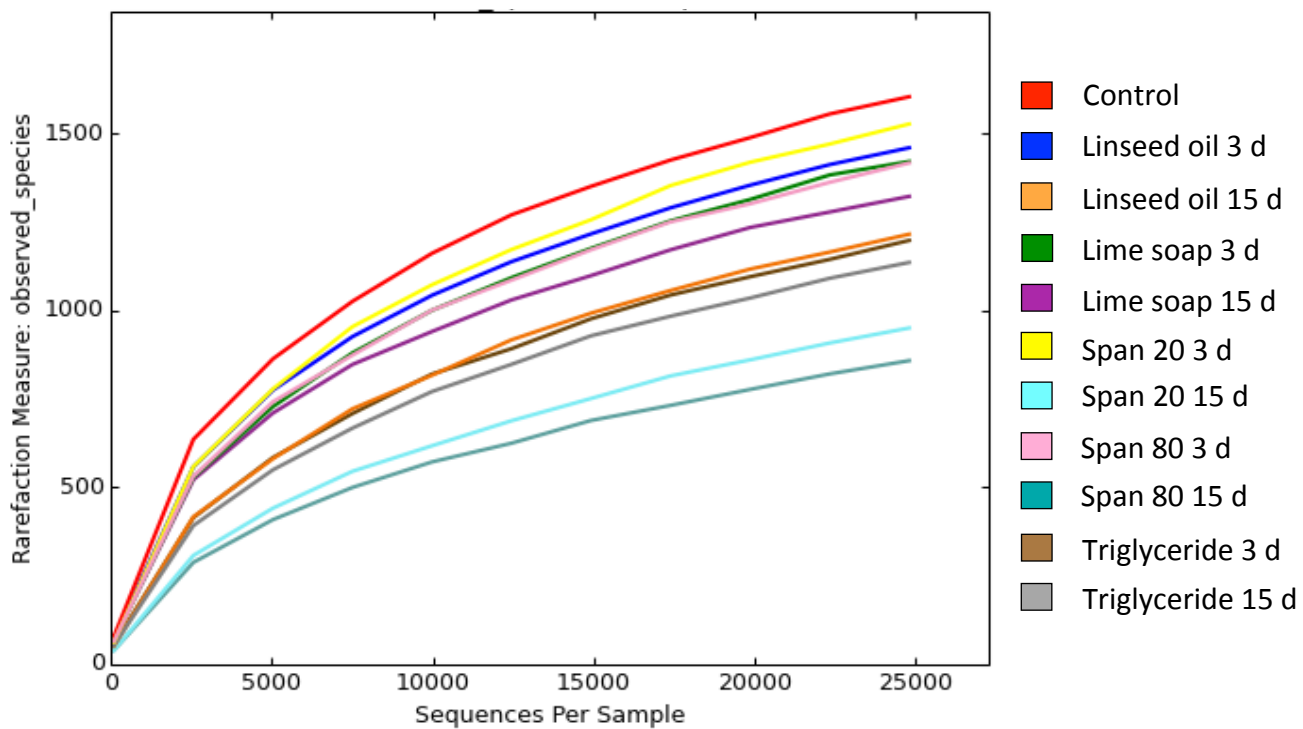

Supplement. Rarefaction curves of all samples

Supplement: Supplementary file 1 [file 22286418]
